# Supplementary material for: Characteristics of Gut Microbiota in Patients With Rheumatoid Arthritis in Shanghai, China
Source: PubMed Central journal article supplement (PMC6819506; doi:10.3389/fcimb.2019.00369), 2019-10-23
Supplement: Data_Sheet_1.pdf [file Data_Sheet_1.pdf]

## Supplementary Material

### 1 Supplementary Figures and Tables

#### 1.1 Supplementary Figures

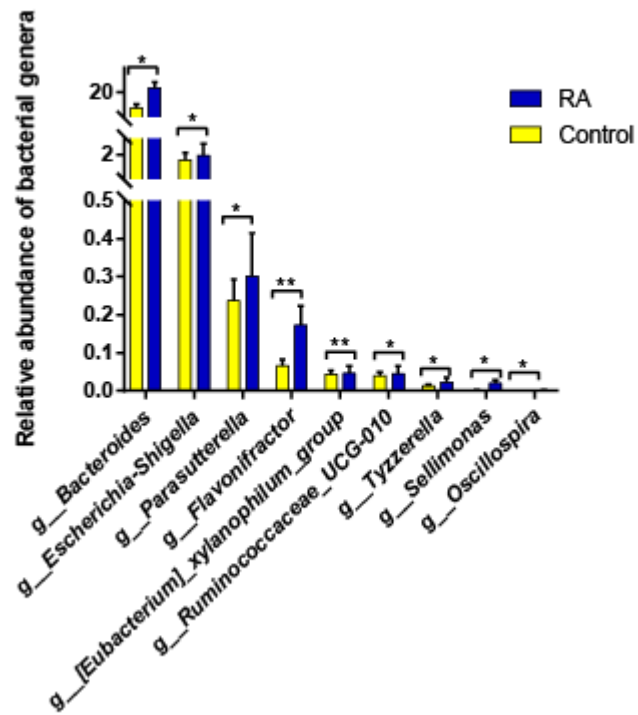

**Supplementary Fig. 1** Bacterial genera with significant higher abundance in the RA group.

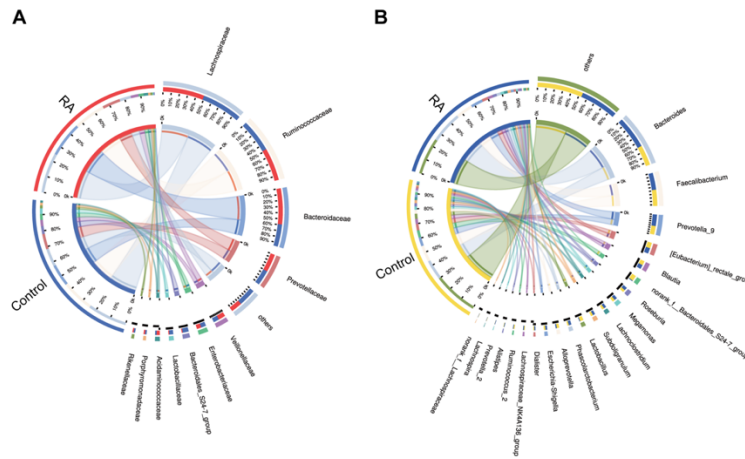

**Supplementary Fig. 2** Differences in composition of the gut microbiome between the RA group and control group. (A)Circos plots were used to visualize the relationship between sample groups and specific bacterial families and (B)genera .

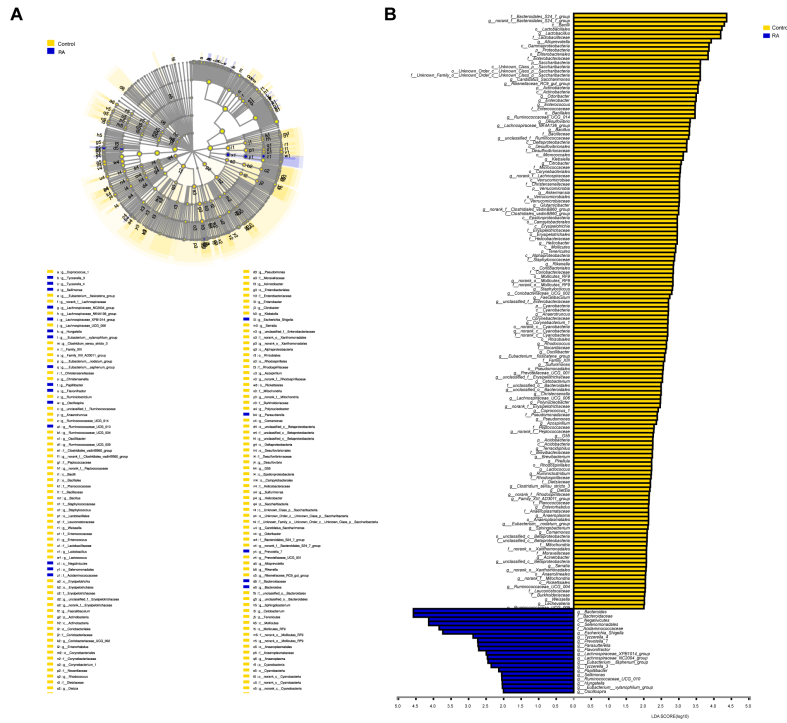

**Supplementary Fig. 3** Differences in abundances of bacterial communities between the RA and healthy control groups. (A) Taxonomic cladogram obtained by LefSe analysis revealing differences in abundances of bacterial communities. RA-enriched and healthy control-enriched taxa are depicted in blue and yellow, respectively. (B) The LDA scores of the RA group and the healthy control group. Histograms in blue and yellow indicate the enriched bacterial taxa in RA patients and healthy control individuals, respectively.

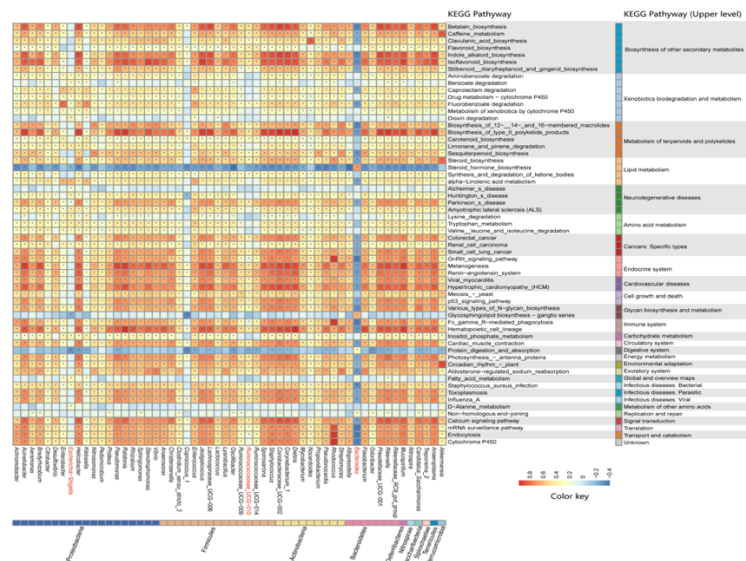

**Supplementary Fig. 4** Bacterial taxa associated with RA related to gene functional pathways. Bacterial gene functions were predicted from 16S rRNA gene-based microbial compositions using the PICRUST algorithm to make inferences from the KEGG annotated databases (Wu et al. 2016). Spearman’s correlation coefficients were estimated for each pairwise comparison of genus and KEGG pathway counts. All KEGG pathways exhibiting a significant difference between the RA and control groups are included, and bacterial genera of interest are shown in the heatmap. The bacterial genera in red were enriched, while the remainder were depleted in the RA group.

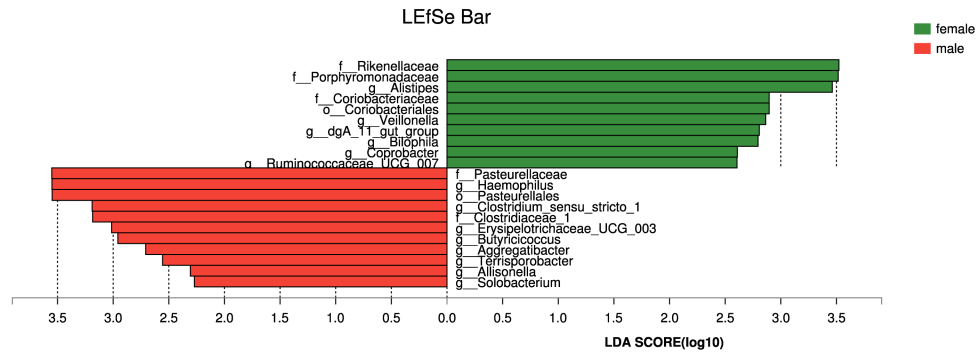

**Supplementary Fig. 5** Differences in abundances of bacterial communities between males and females. Linear discriminant analysis (LDA) score of males and females Histograms in green show enriched bacterial taxa in females, and those in red show enriched bacterial taxa in males.

## 1.2 Supplementary Tables

Supplementary Table 1. Demographic and clinical characteristics of the study cohort with RA

| Sample ID | Gender | Age | Tender joint counts | Swell joint counts | Blood routine examination     |                             |                                    |                                 | Routine urine examination |                        |    |             |            |                |           |
|-----------|--------|-----|---------------------|--------------------|-------------------------------|-----------------------------|------------------------------------|---------------------------------|---------------------------|------------------------|----|-------------|------------|----------------|-----------|
|           |        |     |                     |                    | Leukocyte ( $\times 10^9/L$ ) | Hemoglobin ( $\times g/L$ ) | Erythrocyte ( $\times 10^{12}/L$ ) | Thrombocyte ( $\times 10^9/L$ ) | Urine protein (g/L)       | Urine specific gravity | PH | ketone body | Urine UGLU | Urine RBC (ul) | LEU (/ul) |
| RA -001   | F      | 60  | 4                   | 4                  | 6.93                          | 126                         | 4.15                               | 242                             | -                         | 1.005                  | 8  | -           | normal     | 0-1/HP         | 2-3/HP    |
| RA -002   | F      | 35  | 21                  | 11                 | 7.79                          | 140                         | 4.4                                | 194                             | -                         | 1.005                  | 8  | -           | normal     | 0-1/HP         | 2-3/HP    |
| RA -003   | M      | 65  | 7                   | 6                  | 5.39                          | 129                         | 4.17                               | 242                             | -                         | 1.02                   | 6  | -           | normal     | 0-1/HP         | 2-3/HP    |
| RA -004   | F      | 44  | 8                   | 4                  | 5.86                          | 100                         | 3.71                               | 266                             | -                         | 1.015                  | 8  | -           | normal     | 0-1/HP         | 2-3/HP    |
| RA -005   | M      | 61  | 28                  | 3                  | 9.61                          | 150                         | 4.59                               | 325                             |                           |                        |    |             |            |                |           |
| RA -006   | F      | 61  | 22                  | 22                 | 5.63                          | 133                         | 4.1                                | 197                             | -                         | 1.025                  | 6  | -           | normal     | 0-1/HP         | 2-3/HP    |
| RA -007   | F      | 49  | 3                   | 4                  | 7.06                          | 122                         | 4.44                               | 227                             | -                         | 1.01                   | 7  | -           | normal     | 0-1/HP         | 2-3/HP    |
| RA -008   | F      | 37  | 2                   | 2                  | 9.6                           | 145                         | 4.64                               | 282                             | -                         | 1.015                  | 5  | +           | normal     | 0-1/HP         | 2-3/HP    |
| RA -009   | F      | 27  | 6                   | 1                  | 9.12                          | 121                         | 4.57                               | 286                             | -                         | 1.01                   | 8  | -           | normal     | 0-1/HP         | 2-3/HP    |
| RA -010   | F      | 56  | 4                   | 0                  | 3.3                           | 85                          | 2.6                                | 154                             | -                         | 1.03                   | 5  | -           | normal     | 0-1/HP         | 4-5/HP    |
| RA -011   | F      | 49  | 6                   | 0                  | 9.68                          | 126                         | 4.22                               | 241                             | -                         | 1.025                  | 5  | -           | +          | 0-1/HP         | 2-3/HP    |
| RA -012   | F      | 42  | 18                  | 2                  | 7.56                          | 128                         | 4.63                               | 290                             | -                         | 1.02                   | 6  | -           | normal     | 0-1/HP         | 2-3/HP    |
| RA -013   | F      | 54  | 13                  | 1                  | 4.62                          | 109                         | 3.7                                | 216                             | -                         | 1.02                   | 5  | -           | normal     | 0-1/HP         | 2-3/HP    |
| RA -014   | M      | 63  | 1                   | 2                  |                               |                             |                                    |                                 |                           |                        |    |             |            |                |           |
| RA -015   | M      | 54  | 18                  | 9                  | 9.57                          | 155                         | 5.09                               | 168                             | -                         | 1.02                   | 6  | -           | normal     | 0-1/HP         | 2-3/HP    |
| RA -016   | F      | 62  | 1                   | 1                  |                               |                             |                                    |                                 |                           |                        |    |             |            |                |           |
| RA -017   | M      | 63  | 26                  | 18                 | 8.78                          | 148                         | 4.73                               | 191                             | -                         | 1.02                   | 5  | -           | +          | 0-1/HP         | 2-3/HP    |
| RA -018   | F      | 61  | 4                   | 2                  | 6.91                          | 130                         | 4.15                               | 205                             | -                         | 1.025                  | 7  | -           | normal     | 0-1/HP         | 2-3/HP    |
| RA -019   | F      | 34  | 14                  | 12                 | 7.35                          | 140                         | 4.41                               | 265                             | -                         | 1.015                  | 6  | -           | normal     | 0-1/HP         | 2-3/HP    |
| RA -020   | F      | 73  | 3                   | 1                  |                               |                             |                                    |                                 |                           |                        |    |             |            |                |           |
| RA -021   | F      | 51  | 11                  | 0                  | 4.53                          | 143                         | 4.57                               | 197                             | -                         | 1.015                  | 7  | -           | normal     | 0-1/HP         | 2-3/HP    |
| RA -022   | F      | 35  | 20                  | 20                 | 3.6                           | 121                         | 4.13                               | 159                             | -                         | 1.015                  | 6  | -           | normal     | 0-1/HP         | 2-3/HP    |
| RA -023   | F      | 52  | 15                  | 0                  | 8.26                          | 110                         | 4.2                                | 360                             | -                         | 1.02                   | 7  | -           | normal     | 0-1/HP         | 2-3/HP    |

|         |   |    |    |    |      |     |      |     |   |       |   |   |        |        |        |
|---------|---|----|----|----|------|-----|------|-----|---|-------|---|---|--------|--------|--------|
| RA -024 | F | 69 | 4  | 2  | 6.3  | 152 | 5    | 243 | - | 1.025 | 5 | - | normal | +      | 2-3/HP |
| RA -025 | M | 64 | 6  | 2  | 8.32 | 117 | 3.94 | 433 | - | 1.025 | 5 | - | normal | 0-1/HP | 2-3/HP |
| RA -026 | M | 54 | 18 | 8  |      |     |      |     | - | 1.025 | 5 | - | normal | +++    | 2-3/HP |
| RA -028 | F | 58 | 1  | 0  | 4.84 | 145 | 4.67 | 255 | - | 1.015 | 6 | - | normal | +++    | 7-8/HP |
| RA -029 | M | 62 | 28 | 18 | 7.06 | 111 | 3.44 | 142 | - | 1.03  | 5 | - | normal | 0-1/HP | 2-3/HP |
| RA -030 | F | 58 | 22 | 1  | 9.43 | 128 | 4.15 | 204 | - | 1.02  | 5 | - | normal | 0-1/HP | 2-3/HP |
| RA -031 | F | 54 | 2  | 2  | 6.13 | 134 | 5.12 | 195 | - | 1.01  | 6 | - | normal | 0-1/HP | 2-3/HP |
| RA -032 | F | 64 | 4  | 1  | 6.7  | 128 | 4.11 | 175 | - | 1.015 | 5 | - | normal | 0-1/HP | 2-3/HP |
| RA -035 | F | 55 | 13 | 0  | 4.43 | 144 | 4.9  | 189 | - | 1.01  | 8 | - | normal | 0-1/HP | 3-4/HP |
| RA -036 | F | 51 | 0  | 0  |      |     |      |     |   |       |   |   |        |        |        |
| RA -038 | F | 40 | 7  | 4  | 4.98 | 91  | 3.85 | 386 | - | 1.02  | 5 | - | normal | 0-1/HP | 3-5/HP |
| RA -039 | F | 62 | 5  | 0  | 7.14 | 123 | 4.01 | 258 | - | 1.025 | 7 | - | normal | 1-3/HP | 3-4/HP |
| RA -040 | M | 51 | 3  | 0  | 8.8  | 167 | 5.44 | 195 | - | 1.02  | 6 | - | normal | 0-1/HP | 2-3/HP |
| RA -043 | M | 68 | 23 | 18 | 8.02 | 141 | 4.64 | 171 | - | 1.025 | 6 | - | normal | 0-1/HP | 2-3/HP |
| RA -044 | M | 51 | 26 | 18 | 5.5  | 139 | 4.91 | 221 | - | 1.025 | 6 | - | normal | 0-1/HP | 2-3/HP |
| RA -045 | F | 52 | 24 | 10 | 6.1  | 105 | 4.34 | 260 | - | 1.015 | 7 | - | normal | 0-1/HP | 2-3/HP |
| RA -046 | F | 58 | 4  | 0  | 4.76 | 122 | 4.09 | 215 | - | 1.015 | 7 | - | normal | 0-1/HP | 2-3/HP |
| RA -047 | F | 40 | 10 | 0  | 6.54 | 121 | 3.77 | 327 | - | 1.005 | 7 | - | normal | 0-1/HP | 2-3/HP |
| RA -048 | F | 68 | 48 | 0  |      |     |      |     |   |       |   |   |        |        |        |
| RA -050 | F | 65 | 9  | 8  | 6.22 | 114 | 4.02 | 276 | - | 1.02  | 5 | - | normal | 0-1/HP | 2-3/HP |
| RA -052 | F | 68 | 9  | 3  |      |     |      |     |   |       |   |   |        |        |        |
| RA -053 | F | 46 | 7  | 20 | 5.73 | 137 | 5.41 | 242 |   |       |   |   |        |        |        |
| RA -055 | F | 65 | 14 | 12 | 6.24 | 120 | 3.85 | 126 |   |       |   |   |        |        |        |
| RA -056 | F | 72 | 27 | 15 | 9.83 | 102 | 3.33 | 384 | - |       |   | - | normal | "+++   | 2-3/HP |
| RA -058 | F | 58 | 22 | 20 | 4.18 | 109 | 3.71 | 299 | - | 1.015 | 6 | - | normal | 0-1/HP | 2-3/HP |
| RA -064 | F | 63 | 12 | 4  |      |     |      |     |   |       |   |   |        |        |        |
| RA -067 | M | 67 | 9  | 12 | 8.12 | 120 | 4.45 | 319 |   |       |   |   |        |        |        |
| RA -077 | F | 33 | 1  | 1  | 6.92 | 117 | 4.04 | 305 | - | 1.025 | 5 | - | normal | 0-1/HP | 3-4/HP |
| RA -078 | F | 64 | 25 | 20 | 4.68 | 123 | 4.54 | 169 | - |       |   |   |        |        |        |

Supplementary Material

|         |   |    |    |    |       |     |  |      |     |   |       |   |   |        |        |        |
|---------|---|----|----|----|-------|-----|--|------|-----|---|-------|---|---|--------|--------|--------|
| RA -125 | M | 55 |    |    |       |     |  |      |     |   |       |   |   |        |        |        |
| RA -126 | F | 68 |    |    | 5.3   | 129 |  | 4    | 146 |   |       |   |   |        |        |        |
| RA -127 | F | 58 |    |    |       |     |  |      |     |   |       |   |   |        |        |        |
| RA -128 | F | 47 |    |    |       |     |  |      |     |   |       |   |   |        |        |        |
| RA -130 | F | 67 | 5  | 3  | 5.87  | 141 |  | 4.64 | 236 | - | 1.005 | 6 | - | normal | 0-1/HP | 2-3/HP |
| RA -131 | F | 52 | 20 | 0  | 5.19  | 110 |  | 6.11 | 122 |   |       |   |   |        |        |        |
| RA -132 | M | 62 | 1  | 1  | 5.84  | 118 |  | 3.82 | 179 | - | 1.025 | 5 | - | normal | 6-7/HP | 4-6/HP |
| RA -134 | F | 81 | 10 | 2  | 6.45  | 109 |  | 3.42 | 281 |   |       |   |   |        |        |        |
| RA -135 | F | 40 | 10 | 6  | 7.69  | 117 |  | 4.13 | 206 | - | 1.025 | 7 | - | normal | 0-1/HP | 2-3/HP |
| RA -136 | F | 39 | 8  | 8  | 5.63  | 130 |  | 4.39 | 172 | - | 1.015 | 7 | - | normal | 0-1/HP | 2-3/HP |
| RA -138 | F | 62 | 26 | 14 |       |     |  |      |     | - | 1.005 | 6 | - | normal |        |        |
| RA -139 | F | 38 | 36 | 0  | 11.8  | 115 |  | 3.85 | 304 |   |       |   |   |        |        |        |
| RA -140 | M | 53 | 11 | 15 | 10.34 | 157 |  | 5.26 | 238 | - | 1.025 | 5 | - | normal | 0-1/HP | 2-3/HP |
| RA -141 | F | 37 | 13 | 8  | 6.51  | 118 |  | 4.74 | 328 | - | 1.03  | 5 | - | normal | 0-1/HP | 2-3/HP |

Continued

| Sample ID | Blood biochemistry |       |       |       |       |       | Inflammatory markers |        | Serological indicator |        |        |        |
|-----------|--------------------|-------|-------|-------|-------|-------|----------------------|--------|-----------------------|--------|--------|--------|
|           | ALT                | AST   | ALP   | GGT   | BUN   | Cr    | ESR                  | CRP    | RF ( IU/ml )          |        |        | ACCP   |
|           | (U/L)              | (U/L) | (U/L) | (U/L) | (U/L) | (U/L) | (mm/h)               | (mg/L) | RF-IgM                | RF-IgA | RF-IgG | (U/ml) |
| RA -001   | 10                 | 15    |       |       |       | 41    | 33                   | 22.96  | <20                   | 0.4    | 2.15   | <25    |
| RA -002   | 13                 | 18    |       |       |       |       | 4                    | 0.44   | <20                   | 0.1    | 0.2    | <25    |
| RA -003   | 11                 | 17    |       |       |       | 53    | 27                   | 6.87   | 130                   | 1.08   | 3.86   | 1600   |
| RA -004   | 9                  | 18    | 59    | 10    | 3     | 34    | 119                  | 43.22  | 2300                  |        |        |        |
| RA -005   | 18                 | 18    |       |       |       | 52    | 14                   | 15.63  | 20.4                  | >300   | 53.05  | 1600   |
| RA -006   | 15                 | 24    |       |       |       | 52    | 23                   | 1.2    | 126                   | 9.3    | 13.1   | 283.52 |
| RA -007   | 13                 | 20    |       |       |       | 41    | 38                   | 0.8    | 67.4                  | 36.56  | 59.76  | 1098.2 |
| RA -008   | 9                  | 12    |       |       |       | 48    | 2                    | 2.96   | <20                   | 3.85   | 10.36  | <25    |
| RA -009   | 15                 | 19    |       |       |       | 47    | 53                   | 16.63  | 27.1                  | 5.97   | 21.51  | 314.51 |
| RA -010   | 10                 | 22    |       |       | 4.8   | 49    | 109                  | 6.6    | 653                   | 25.52  | 83.9   | <25    |
| RA -011   | 16                 | 12    |       |       |       |       | 21                   | 0.69   | 20.6                  | 3.64   | 36.03  | <25    |
| RA -012   | 11                 | 17    |       |       | 7     | 53    | 7                    | 3.22   | <20                   | 0.13   | 1.82   | <25    |
| RA -013   | 11                 | 14    | 51    | 17    | 7.3   | 72    | 53                   | 12.39  | 390                   | 149.57 | 20.8   | 967.52 |
| RA -014   |                    |       |       |       |       |       |                      |        |                       |        |        |        |
| RA -015   | 9                  | 14    |       |       |       | 55    | 16                   | 9.16   | 123                   | 17.1   | 99.97  | <25    |
| RA -016   |                    |       |       |       |       |       |                      |        |                       |        |        |        |



|         |    |    |     |    |      |     |     |       |      |        |        |         |
|---------|----|----|-----|----|------|-----|-----|-------|------|--------|--------|---------|
| RA -017 | 17 | 20 | 54  | 27 | 7.6  | 72  | 19  | 6.02  | 621  | 37.61  | 139.11 | 1600    |
| RA -018 | 37 | 33 | 69  | 30 | 5.6  | 48  | 22  | 2.75  | 81.3 | 0.48   | 3.55   | <25     |
| RA -019 | 14 | 18 | 80  | 16 |      | 47  | 14  | 1.64  | <20  | 0.31   | 1.5    | 164.55  |
| RA -020 |    |    |     |    |      |     |     |       |      |        |        |         |
| RA -021 | 17 | 27 |     |    |      |     | 8   | 0.54  | <20  | 1.28   | 0.99   | <25     |
| RA -022 | 18 | 20 |     |    |      | 30  | 23  | 0.5   | 69.9 | 9.85   | 34.36  | 85.46   |
| RA -023 | 5  | 16 | 88  | 16 | 5.3  | 35  | 77  | 13.44 | 547  | 104.65 | 90.88  | 77.07   |
| RA -024 | 22 | 28 |     |    | 4.2  | 49  | 10  | 0.96  | <20  | 0.85   | 2.55   | <25     |
| RA -025 |    |    |     |    |      |     | 68  | 24.19 | 22.4 | 5.33   | 4.86   | 195.39  |
| RA -026 |    |    |     |    |      |     |     |       | 23.1 | 38.46  | >300   | 107.88  |
| RA -028 | 32 | 23 |     |    | 42   | 60  | 15  | 0.92  | <20  | 3.09   | 1.59   | <25     |
| RA -029 | 50 | 42 |     |    | 10.9 | 55  | 104 | 83.01 | 148  | 11.81  | 66.49  | 45.58   |
| RA -030 | 10 | 17 |     |    |      | 41  | 30  | 2.04  | 491  | 15.36  | 95.37  | 305.72  |
| RA -031 | 6  | 17 |     |    | 3.4  | 55  | 26  | 5.77  | 242  | 211.54 | 85.99  | 192.75  |
| RA -032 | 11 | 15 |     |    | 6.9  | 238 | 31  | 0.5   | 209  | 57.82  | 97.86  | 343.25  |
| RA -035 |    |    |     |    |      |     | 10  | 0.5   |      |        |        |         |
| RA -036 |    |    |     |    |      |     |     |       |      |        |        |         |
| RA -038 | 7  | 9  | 74  | 14 | 4.8  | 42  | 110 | 78.4  | 411  | 9.85   | 94.6   |         |
| RA -039 | 10 | 16 |     |    | 4.2  | 48  | 30  | 0.4   | 258  |        |        | 1600    |
| RA -040 | 14 | 18 | 60  | 22 | 7    | 55  | 4   | 2.64  | <20  | 58.09  | 29.42  | 67.57   |
| RA -043 | 12 | 17 | 86  | 14 | 6    | 72  | 16  | 2.45  | 263  | >300   | 33.66  |         |
| RA -044 | 9  | 15 | 82  | 14 | 8.7  | 65  | 18  | 0.5   | <20  | 2.24   | 0.6    | <25     |
| RA -045 | 10 | 12 | 63  | 12 | 3.3  | 40  | 37  | 4.77  | 209  | 1.86   | 15.14  | 1130.91 |
| RA -046 | 39 | 33 |     |    |      | 50  | 9   | 0.33  | <20  | 0.15   | 0.29   | 44.23   |
| RA -047 | 12 | 20 | 60  | 10 | 3.4  | 54  | 48  | 7.9   | 75.9 | 5.02   | 30.49  | 625.64  |
| RA -048 |    |    |     |    |      |     |     |       |      |        |        |         |
| RA -050 | 8  | 15 | 98  | 15 | 5.2  | 70  | 80  | 26.86 |      |        |        |         |
| RA -052 |    |    |     |    |      |     |     |       |      |        |        |         |
| RA -053 | 36 | 42 | 118 | 49 | 3.4  | 49  | 36  | 0.5   | 21.4 | 42.03  | 20.85  | 147.06  |

|         |    |    |     |    |      |      |     |        |       |        |        |        |
|---------|----|----|-----|----|------|------|-----|--------|-------|--------|--------|--------|
| RA -055 |    |    |     |    | 4.5  | 52.4 | 26  | 17     | 162.2 |        |        |        |
| RA -056 | 10 | 10 | 65  | 24 | 7.8  | 51   | 75  | 13.31  | >2460 | 169.94 | 230.68 | 73.12  |
| RA -058 |    |    |     |    |      |      | 70  | 62.01  | <20   |        |        | <25    |
| RA -064 |    |    |     |    |      |      |     |        |       |        |        |        |
| RA -067 | 10 | 16 | 97  | 16 | 8.5  | 61   | 116 | 81.47  | 10    |        | 49     | 738    |
| RA -077 | 6  | 13 |     |    | 268  | 52   | 36  | 4.87   | 304   | >300   | 79.26  | 1213   |
| RA -078 | 63 | 42 |     |    |      | 52   | 27  |        | 478   | 10.14  | 119.07 | <25    |
| RA -125 |    |    |     |    |      |      |     |        |       |        |        |        |
| RA -126 |    |    |     |    |      | <5   | 2   |        |       |        |        | <25    |
| RA -127 |    |    |     |    |      |      |     |        |       |        |        |        |
| RA -128 |    |    |     |    |      |      |     |        |       |        |        |        |
| RA -130 | 22 | 28 |     |    | 40.2 | 0.5  | 14  | 0.7    | 463   | 6      | 63     | 1071   |
| RA -131 | 19 | 18 |     |    | 47.5 |      | 7   | 0.85   | <20   | 3.8    | 1.3    | <25    |
| RA -132 | 44 | 30 |     |    |      | 61.2 | 25  | 0.6    | 572   | 1.3    | 58     | <25    |
| RA -134 |    |    |     |    |      |      | 70  | 38.06  | <20   | 1.3    | 4.2    | <25    |
| RA -135 |    |    |     |    |      |      | 37  | 2.3    | 114   | 66.94  | 79.45  | 170.57 |
| RA -136 | 11 | 16 |     |    |      |      | 12  | 0.91   | <20   | 1.4    | 4.1    | <25    |
| RA -138 |    |    |     |    |      |      |     |        |       |        |        |        |
| RA -139 | 24 | 23 |     |    | 4.26 | 46   | 97  | 111.02 |       |        |        |        |
| RA -140 | 17 | 18 | 114 |    | 4.2  | 51.2 | 5   | 1.84   | 36.2  | 69     | 8      | 323    |
| RA -141 | 13 | 16 | 59  | 17 | 3.7  | 42.5 | 19  | 0.96   | 283   | 109    | 133    | 1117   |

ALT = alanine aminotransferase, AST= aspartate amino transferase, ALP = alkaline phosphatase, GGT = gamma-glutamyl transpeptidase, BUN = blood urea nitrogen, Cr = creatinine, ESR = erythrocyte sedimentation rate, CRP = C-reactive protein

Supplementary Table 2. Bacterial genera significantly altered between RA group and healthy control (GUT) group

| Species name                          | GUT-Mean (%) | GUT-SD (%) | RA-Mean (%) | RA-SD (%) | P-value  | Corrected p-value | Lower CI | Upper CI | Effect size |
|---------------------------------------|--------------|------------|-------------|-----------|----------|-------------------|----------|----------|-------------|
| <i>g_Rikenellaceae_RC9_gut_group</i>  | 0.6708       | 1.1        | 9.46E-05    | 0.00054   | 4.55E-14 | 1.02E-11          | -0.9557  | -0.3886  | -0.6708     |
| <i>g_Helicobacter</i>                 | 0.1642       | 0.2777     | 0           | 0         | 4.67E-14 | 1.02E-11          | -0.2385  | -0.0962  | -0.1642     |
| <i>g_Rhodococcus</i>                  | 0.09505      | 0.1819     | 0.004259    | 0.01258   | 2.31E-13 | 3.38E-11          | -0.1459  | -0.05103 | -0.09079    |
| <i>g_Candidatus_Saccharimonas</i>     | 0.7426       | 1.303      | 0.000379    | 0.001287  | 1.88E-12 | 2.06E-10          | -1.073   | -0.4138  | -0.7422     |
| <i>g_Coriobacteriaceae_UCG-002</i>    | 0.1147       | 0.1953     | 0           | 0         | 2.38E-12 | 2.09E-10          | -0.1648  | -0.0685  | -0.1147     |
| <i>g_Glutamicibacter</i>              | 0.186        | 0.3246     | 9.46E-05    | 0.00054   | 7.38E-12 | 4.04E-10          | -0.2707  | -0.1119  | -0.1859     |
| <i>g_Faecalibaculum</i>               | 0.1014       | 0.1676     | 4.73E-05    | 0.000384  | 7.26E-12 | 4.04E-10          | -0.1446  | -0.06143 | -0.1014     |
| <i>g_norank_f_Erysipelotrichaceae</i> | 0.05887      | 0.1016     | 0.005963    | 0.04767   | 5.86E-12 | 4.04E-10          | -0.07939 | -0.02449 | -0.05291    |
| <i>g_Acinetobacter</i>                | 0.0227       | 0.0383     | 0           | 0         | 1.55E-11 | 7.54E-10          | -0.03269 | -0.01379 | -0.02269    |
| <i>g_Rikenella</i>                    | 0.13         | 0.2198     | 9.46E-05    | 0.00054   | 2.08E-11 | 9.12E-10          | -0.1861  | -0.07877 | -0.1299     |
| <i>g_Anaeroplasma</i>                 | 0.02488      | 0.04518    | 0           | 0         | 3.87E-11 | 1.54E-09          | -0.03717 | -0.01437 | -0.02488    |
| <i>g_Corynebacterium_1</i>            | 0.08766      | 0.1587     | 4.73E-05    | 0.000384  | 4.82E-11 | 1.76E-09          | -0.1335  | -0.04962 | -0.08761    |
| <i>g_Staphylococcus</i>               | 0.1215       | 0.2101     | 0.000331    | 0.001655  | 6.53E-11 | 2.16E-09          | -0.1749  | -0.06763 | -0.1212     |
| <i>g_Prevotellaceae_UCG-001</i>       | 0.06731      | 0.1096     | 0.003218    | 0.02427   | 6.91E-11 | 2.16E-09          | -0.09335 | -0.03634 | -0.06409    |
| <i>g_Acetatifactor</i>                | 0.01619      | 0.02755    | 0           | 0         | 2.35E-10 | 6.42E-09          | -0.02405 | -0.00937 | -0.01619    |
| <i>g_Jeotgalicoccus</i>               | 0.009838     | 0.01657    | 0           | 0         | 2.33E-10 | 6.42E-09          | -0.01416 | -0.00552 | -0.00984    |
| <i>g_norank_c_Cyanobacteria</i>       | 0.08917      | 0.1476     | 0.001183    | 0.002436  | 4.6E-10  | 1.08E-08          | -0.1223  | -0.05186 | -0.08799    |
| <i>g_Lachnospiraceae_UCG-006</i>      | 0.05434      | 0.09252    | 0.000284    | 0.001311  | 4.99E-10 | 1.08E-08          | -0.08023 | -0.03199 | -0.05406    |
| <i>g_Brevibacterium</i>               | 0.03082      | 0.0563     | 0           | 0         | 5.65E-10 | 1.08E-08          | -0.04628 | -0.01754 | -0.03082    |
| <i>g_Dietzia</i>                      | 0.02759      | 0.04763    | 0           | 0         | 5.66E-10 | 1.08E-08          | -0.04008 | -0.01614 | -0.02759    |
| <i>g_Mucispirillum</i>                | 0.01754      | 0.03161    | 0           | 0         | 5.66E-10 | 1.08E-08          | -0.02639 | -0.00999 | -0.01754    |
| <i>g_Treponema_2</i>                  | 0.01671      | 0.02854    | 9.46E-05    | 0.00054   | 4.38E-10 | 1.08E-08          | -0.02467 | -0.00922 | -0.01661    |
| <i>g_Sporosarcina</i>                 | 0.01411      | 0.02484    | 0           | 0         | 5.64E-10 | 1.08E-08          | -0.0204  | -0.00807 | -0.01411    |
| <i>g_Christensenella</i>              | 0.05726      | 0.09743    | 0.000899    | 0.002834  | 1.16E-09 | 2.11E-08          | -0.08095 | -0.03197 | -0.05636    |
| <i>g_norank_c_Acidobacteria</i>       | 0.01244      | 0.02274    | 4.73E-05    | 0.000384  | 2.06E-09 | 3.62E-08          | -0.01812 | -0.0072  | -0.01239    |
| <i>g_Ralstonia</i>                    | 0.01478      | 0.02707    | 0           | 0         | 3.15E-09 | 5.3E-08           | -0.02186 | -0.00797 | -0.01478    |
| <i>g_Enterorhabdus</i>                | 0.02644      | 0.04349    | 0.000946    | 0.005849  | 3.33E-09 | 5.4E-08           | -0.03606 | -0.01504 | -0.0255     |

## Supplementary Material

|                                                   |          |          |          |          |          |          |          |          |          |
|---------------------------------------------------|----------|----------|----------|----------|----------|----------|----------|----------|----------|
| <i>g__Bacillus</i>                                | 0.5491   | 4.068    | 0.002129 | 0.01249  | 6.85E-09 | 1.07E-07 | -1.602   | -0.01435 | -0.5471  |
| <i>g__unclassified_f__Family_XIII</i>             | 0.01015  | 0.0187   | 0        | 0        | 7.27E-09 | 1.1E-07  | -0.01536 | -0.00583 | -0.01015 |
| <i>g__Pseudomonas</i>                             | 0.04982  | 0.1218   | 0.000189 | 0.000751 | 7.78E-09 | 1.14E-07 | -0.08252 | -0.02358 | -0.04962 |
| <i>g__RB41</i>                                    | 0.01228  | 0.02039  | 4.73E-05 | 0.000384 | 1.14E-08 | 1.61E-07 | -0.01755 | -0.0074  | -0.01224 |
| <i>g__Atopostipes</i>                             | 0.01036  | 0.02109  | 0        | 0        | 1.67E-08 | 2.15E-07 | -0.01661 | -0.00515 | -0.01036 |
| <i>g__norank_f__Nitrosomonadaceae</i>             | 0.006611 | 0.01335  | 0        | 0        | 1.66E-08 | 2.15E-07 | -0.01057 | -0.00328 | -0.00661 |
| <i>g__Shewanella</i>                              | 0.004893 | 0.008517 | 0        | 0        | 1.66E-08 | 2.15E-07 | -0.00729 | -0.00281 | -0.00489 |
| <i>g__norank_f__Clostridiales_vadinBB60_group</i> | 0.1909   | 0.3197   | 0.007761 | 0.02391  | 2.27E-08 | 2.84E-07 | -0.2675  | -0.1116  | -0.1832  |
| <i>g__Oscillibacter</i>                           | 0.08183  | 0.1367   | 0.005915 | 0.03308  | 2.92E-08 | 3.55E-07 | -0.1132  | -0.04164 | -0.07591 |
| <i>g__unclassified_f__Erysipelotrichaceae</i>     | 0.06538  | 0.1133   | 0.003691 | 0.02209  | 3.41E-08 | 4.04E-07 | -0.09183 | -0.03328 | -0.06169 |
| <i>g__Rubrobacter</i>                             | 0.01202  | 0.02126  | 0        | 0        | 3.79E-08 | 4.25E-07 | -0.01765 | -0.00692 | -0.01202 |
| <i>g__Microvirga</i>                              | 0.005362 | 0.009363 | 0        | 0        | 3.77E-08 | 4.25E-07 | -0.00781 | -0.00323 | -0.00536 |
| <i>g__Nesterenkonia</i>                           | 0.01223  | 0.02255  | 4.73E-05 | 0.000384 | 6.35E-08 | 6.95E-07 | -0.01785 | -0.00699 | -0.01219 |
| <i>g__Paracoccus</i>                              | 0.008225 | 0.01564  | 4.73E-05 | 0.000384 | 6.57E-08 | 7.01E-07 | -0.0126  | -0.00463 | -0.00818 |
| <i>g__unclassified_o__Bacteroidales</i>           | 0.05898  | 0.09907  | 0.002887 | 0.0102   | 8.14E-08 | 7.88E-07 | -0.08353 | -0.03209 | -0.05609 |
| <i>g__Nosocomiicoccus</i>                         | 0.007131 | 0.01306  | 0        | 0        | 8.45E-08 | 7.88E-07 | -0.01041 | -0.0039  | -0.00713 |
| <i>g__Micrococcus</i>                             | 0.00609  | 0.0111   | 0        | 0        | 8.45E-08 | 7.88E-07 | -0.00911 | -0.00333 | -0.00609 |
| <i>g__norank_f__ODPI230B8.23</i>                  | 0.004008 | 0.007411 | 0        | 0        | 8.36E-08 | 7.88E-07 | -0.00609 | -0.00219 | -0.00401 |
| <i>g__Achromobacter</i>                           | 0.002915 | 0.006969 | 0        | 0        | 8.22E-08 | 7.88E-07 | -0.00495 | -0.00146 | -0.00292 |
| <i>g__Bradyrhizobium</i>                          | 0.002394 | 0.004541 | 0        | 0        | 8.16E-08 | 7.88E-07 | -0.00354 | -0.00125 | -0.00239 |
| <i>g__Alloprevotella</i>                          | 2.616    | 4.159    | 1.127    | 4.466    | 9.44E-08 | 8.62E-07 | -2.858   | 0.06179  | -1.489   |
| <i>g__norank_f__Peptococcaceae</i>                | 0.03685  | 0.06148  | 0.002934 | 0.0146   | 9.64E-08 | 8.62E-07 | -0.05008 | -0.01877 | -0.03392 |
| <i>g__Ruminiclostridium</i>                       | 0.02946  | 0.05136  | 0.000852 | 0.003125 | 1.35E-07 | 1.18E-06 | -0.042   | -0.01648 | -0.02861 |
| <i>g__Rhizobium</i>                               | 0.006507 | 0.01213  | 9.46E-05 | 0.000769 | 1.83E-07 | 1.44E-06 | -0.00944 | -0.00359 | -0.00641 |
| <i>g__Brachybacterium</i>                         | 0.005934 | 0.01052  | 0        | 0        | 1.87E-07 | 1.44E-06 | -0.00859 | -0.00344 | -0.00593 |
| <i>g__norank_f__Acidobacteriaceae_Subgroup_1</i>  | 0.004529 | 0.008242 | 0        | 0        | 1.86E-07 | 1.44E-06 | -0.00677 | -0.0026  | -0.00453 |
| <i>g__Stenotrophomonas</i>                        | 0.004164 | 0.00749  | 0        | 0        | 1.86E-07 | 1.44E-06 | -0.00604 | -0.00239 | -0.00416 |
| <i>g__Mizugakiibacter</i>                         | 0.00406  | 0.008574 | 0        | 0        | 1.86E-07 | 1.44E-06 | -0.00625 | -0.00219 | -0.00406 |
| <i>g__Burkholderia-Paraburkholderia</i>           | 0.0038   | 0.007321 | 0        | 0        | 1.86E-07 | 1.44E-06 | -0.00593 | -0.00208 | -0.0038  |
| <i>g__norank_f__Xanthobacteraceae</i>             | 0.00354  | 0.007375 | 0        | 0        | 1.85E-07 | 1.44E-06 | -0.00536 | -0.00193 | -0.00354 |
| <i>g__[Eubacterium]_nodatum_group</i>             | 0.02764  | 0.04152  | 0.004259 | 0.01344  | 2.16E-07 | 1.63E-06 | -0.03385 | -0.01272 | -0.02338 |

|                                             |          |          |          |          |          |          |          |          |          |
|---------------------------------------------|----------|----------|----------|----------|----------|----------|----------|----------|----------|
| <i>g__Enterococcus</i>                      | 0.6214   | 1.04     | 0.05314  | 0.3338   | 3.14E-07 | 2.33E-06 | -0.8427  | -0.3006  | -0.5682  |
| <i>g__norank_o__SC-I-84</i>                 | 0.00432  | 0.008114 | 4.73E-05 | 0.000384 | 3.34E-07 | 2.44E-06 | -0.00662 | -0.00246 | -0.00427 |
| <i>g__norank_f__288-2</i>                   | 0.004737 | 0.008843 | 0        | 0        | 4.08E-07 | 2.75E-06 | -0.00708 | -0.0026  | -0.00474 |
| <i>g__Flavobacterium</i>                    | 0.003384 | 0.006437 | 0        | 0        | 4.05E-07 | 2.75E-06 | -0.0051  | -0.00193 | -0.00338 |
| <i>g__norank_c__KD4-96</i>                  | 0.002915 | 0.005359 | 0        | 0        | 4.07E-07 | 2.75E-06 | -0.00427 | -0.00167 | -0.00292 |
| <i>g__unclassified_f__Xanthobacteraceae</i> | 0.002655 | 0.00504  | 0        | 0        | 4.04E-07 | 2.75E-06 | -0.00401 | -0.00146 | -0.00266 |
| <i>g__Anaerovorax</i>                       | 0.00177  | 0.003063 | 0        | 0        | 3.99E-07 | 2.75E-06 | -0.0025  | -0.00104 | -0.00177 |
| <i>g__norank_f__Rhodospirillaceae</i>       | 0.03019  | 0.06756  | 0.008613 | 0.03954  | 5.78E-07 | 3.84E-06 | -0.04562 | -0.00434 | -0.02158 |
| <i>g__Sphingomonas</i>                      | 0.003748 | 0.007246 | 4.73E-05 | 0.000384 | 7.49E-07 | 4.89E-06 | -0.00563 | -0.00198 | -0.0037  |
| <i>g__unclassified_f__Comamonadaceae</i>    | 0.00531  | 0.01064  | 0        | 0        | 8.83E-07 | 5.3E-06  | -0.00812 | -0.00276 | -0.00531 |
| <i>g__Blastococcus</i>                      | 0.003956 | 0.00756  | 0        | 0        | 8.83E-07 | 5.3E-06  | -0.00593 | -0.00229 | -0.00396 |
| <i>g__Vibrio</i>                            | 0.003956 | 0.008775 | 0        | 0        | 8.81E-07 | 5.3E-06  | -0.00666 | -0.00198 | -0.00396 |
| <i>g__norank_p__WS6</i>                     | 0.00354  | 0.006767 | 0        | 0        | 8.82E-07 | 5.3E-06  | -0.00526 | -0.00198 | -0.00354 |
| <i>g__Soonwooa</i>                          | 0.003071 | 0.005793 | 0        | 0        | 8.82E-07 | 5.3E-06  | -0.00458 | -0.00161 | -0.00307 |
| <i>g__Pseudonocardia</i>                    | 0.001926 | 0.003641 | 0        | 0        | 8.66E-07 | 5.3E-06  | -0.00292 | -0.00109 | -0.00193 |
| <i>g__Enterobacter</i>                      | 0.9451   | 2.834    | 0.8529   | 3.033    | 9.73E-07 | 5.76E-06 | -1.151   | 0.9806   | -0.09228 |
| <i>g__Ruminococcaceae_UCG-014</i>           | 0.7164   | 1.065    | 0.2025   | 0.4618   | 1.44E-06 | 8.44E-06 | -0.8068  | -0.2496  | -0.5139  |
| <i>g__norank_f__Christensenellaceae</i>     | 0.01728  | 0.04355  | 0.002129 | 0.005645 | 1.73E-06 | 9.95E-06 | -0.02696 | -0.00684 | -0.01515 |
| <i>g__Halanaerobium</i>                     | 0.004841 | 0.01025  | 0        | 0        | 1.89E-06 | 1.01E-05 | -0.00755 | -0.0024  | -0.00484 |
| <i>g__norank_o__Gastranaerophilales</i>     | 0.00406  | 0.008118 | 0        | 0        | 1.89E-06 | 1.01E-05 | -0.00619 | -0.00224 | -0.00406 |
| <i>g__Aeromonas</i>                         | 0.003904 | 0.01442  | 0        | 0        | 1.89E-06 | 1.01E-05 | -0.00848 | -0.00141 | -0.0039  |
| <i>g__norank_c__Actinobacteria</i>          | 0.002394 | 0.004892 | 0        | 0        | 1.88E-06 | 1.01E-05 | -0.00364 | -0.0013  | -0.00239 |
| <i>g__Arthrobacter</i>                      | 0.002394 | 0.004613 | 0        | 0        | 1.88E-06 | 1.01E-05 | -0.00349 | -0.0013  | -0.00239 |
| <i>g__norank_p__Tectomicrobia</i>           | 0.001666 | 0.00352  | 0        | 0        | 1.86E-06 | 1.01E-05 | -0.00271 | -0.00088 | -0.00167 |
| <i>g__Akkermansia</i>                       | 0.2031   | 0.8314   | 0.05702  | 0.2295   | 1.93E-06 | 1.02E-05 | -0.3736  | 0.01884  | -0.1461  |
| <i>g__Lactobacillus</i>                     | 3.5      | 6.035    | 0.6953   | 3.346    | 2.69E-06 | 0.000014 | -4.535   | -0.9814  | -2.805   |
| <i>g__Catabacter</i>                        | 0.004841 | 0.008479 | 0.000284 | 0.001311 | 2.85E-06 | 1.47E-05 | -0.00693 | -0.00263 | -0.00456 |
| <i>g__Odoribacter</i>                       | 0.7093   | 0.9294   | 0.1544   | 0.251    | 3.26E-06 | 1.66E-05 | -0.8042  | -0.3107  | -0.5549  |
| <i>g__Solirubrobacter</i>                   | 0.002967 | 0.006336 | 4.73E-05 | 0.000384 | 3.55E-06 | 1.79E-05 | -0.00453 | -0.00142 | -0.00292 |
| <i>g__Arcobacter</i>                        | 0.00203  | 0.003674 | 4.73E-05 | 0.000384 | 3.74E-06 | 1.86E-05 | -0.00287 | -0.00109 | -0.00198 |

## Supplementary Material

|                                              |          |          |          |          |          |          |          |          |          |
|----------------------------------------------|----------|----------|----------|----------|----------|----------|----------|----------|----------|
| <i>g__Lysinibacillus</i>                     | 0.01431  | 0.09297  | 0        | 0        | 4E-06    | 1.87E-05 | -0.04893 | -0.00141 | -0.01432 |
| <i>g__unclassified_f__Micromonosporaceae</i> | 0.005205 | 0.01119  | 0        | 0        | 4.01E-06 | 1.87E-05 | -0.00797 | -0.00271 | -0.00521 |
| <i>g__norank_o__Gaiellales</i>               | 0.004945 | 0.009747 | 0        | 0        | 4.01E-06 | 1.87E-05 | -0.0076  | -0.00281 | -0.00495 |
| <i>g__norank_o__JG30-KF-CM45</i>             | 0.003279 | 0.007006 | 0        | 0        | 4E-06    | 1.87E-05 | -0.00526 | -0.00161 | -0.00328 |
| <i>g__norank_o__AKYG1722</i>                 | 0.002238 | 0.004383 | 0        | 0        | 3.99E-06 | 1.87E-05 | -0.00349 | -0.00115 | -0.00224 |
| <i>g__norank_f__Gemmatimonadaceae</i>        | 0.002082 | 0.004093 | 0        | 0        | 3.99E-06 | 1.87E-05 | -0.00318 | -0.00115 | -0.00208 |
| <i>g__norank_f__Flavobacteriaceae</i>        | 0.00229  | 0.004909 | 9.46E-05 | 0.000769 | 4.93E-06 | 2.27E-05 | -0.0037  | -0.00109 | -0.0022  |
| <i>g__Morganella</i>                         | 0.001978 | 0.005269 | 9.46E-05 | 0.000769 | 5.42E-06 | 2.48E-05 | -0.00345 | -0.00081 | -0.00188 |
| <i>g__norank_c__Gitt-GS-136</i>              | 0.002915 | 0.006502 | 0        | 0        | 8.39E-06 | 3.68E-05 | -0.00468 | -0.00135 | -0.00292 |
| <i>g__Nitrospira</i>                         | 0.002707 | 0.006232 | 0        | 0        | 8.37E-06 | 3.68E-05 | -0.00427 | -0.0013  | -0.00271 |
| <i>g__Sphingobium</i>                        | 0.00229  | 0.004523 | 0        | 0        | 8.4E-06  | 3.68E-05 | -0.00338 | -0.0012  | -0.00229 |
| <i>g__Acidibacter</i>                        | 0.001458 | 0.002786 | 0        | 0        | 8.34E-06 | 3.68E-05 | -0.00219 | -0.00083 | -0.00146 |
| <i>g__Mycobacterium</i>                      | 0.002499 | 0.004409 | 0.000142 | 0.000656 | 9.95E-06 | 4.32E-05 | -0.00351 | -0.00131 | -0.00236 |
| <i>g__Citrobacter</i>                        | 0.3332   | 1.795    | 0.02896  | 0.08211  | 1.32E-05 | 5.67E-05 | -0.7937  | -0.02906 | -0.3042  |
| <i>g__Lactococcus</i>                        | 0.03352  | 0.09106  | 0.001514 | 0.006156 | 1.65E-05 | 7.02E-05 | -0.05708 | -0.0114  | -0.03201 |
| <i>g__Caulobacter</i>                        | 0.002915 | 0.0111   | 0        | 0        | 1.74E-05 | 7.07E-05 | -0.00599 | -0.00094 | -0.00292 |
| <i>g__Geodermatophilus</i>                   | 0.002447 | 0.005518 | 0        | 0        | 1.74E-05 | 7.07E-05 | -0.00396 | -0.0013  | -0.00245 |
| <i>g__Thermus</i>                            | 0.001822 | 0.00374  | 0        | 0        | 1.74E-05 | 7.07E-05 | -0.00292 | -0.00094 | -0.00182 |
| <i>g__norank_f__Rhodobiaceae</i>             | 0.00177  | 0.00404  | 0        | 0        | 1.74E-05 | 7.07E-05 | -0.00292 | -0.00088 | -0.00177 |
| <i>g__Streptomyces</i>                       | 0.001562 | 0.003227 | 0        | 0        | 1.74E-05 | 7.07E-05 | -0.00245 | -0.00083 | -0.00156 |
| <i>g__Proteus</i>                            | 0.002863 | 0.00512  | 0.000189 | 0.000751 | 2.35E-05 | 9.42E-05 | -0.00413 | -0.00142 | -0.00267 |
| <i>g__Alcaligenes</i>                        | 0.007496 | 0.04669  | 0        | 0        | 3.59E-05 | 0.000134 | -0.02488 | -0.00088 | -0.0075  |
| <i>g__Dongia</i>                             | 0.002394 | 0.007028 | 0        | 0        | 3.58E-05 | 0.000134 | -0.00432 | -0.00078 | -0.00239 |
| <i>g__H16</i>                                | 0.001874 | 0.004424 | 0        | 0        | 3.59E-05 | 0.000134 | -0.00307 | -0.00088 | -0.00187 |
| <i>g__Microlunatus</i>                       | 0.001614 | 0.003792 | 0        | 0        | 3.57E-05 | 0.000134 | -0.00266 | -0.00078 | -0.00161 |
| <i>g__Elizabethkingia</i>                    | 0.001353 | 0.002953 | 0        | 0        | 3.58E-05 | 0.000134 | -0.00213 | -0.00068 | -0.00135 |
| <i>g__Truepera</i>                           | 0.001249 | 0.002648 | 0        | 0        | 3.57E-05 | 0.000134 | -0.00193 | -0.00057 | -0.00125 |
| <i>g__norank_f__P-102</i>                    | 0.001197 | 0.002703 | 0        | 0        | 3.57E-05 | 0.000134 | -0.00198 | -0.00057 | -0.0012  |
| <i>g__Roseiflexus</i>                        | 0.001093 | 0.00256  | 0        | 0        | 3.53E-05 | 0.000134 | -0.00172 | -0.00052 | -0.00109 |
| <i>g__Parvibacter</i>                        | 0.002603 | 0.00446  | 0.000142 | 0.000656 | 3.65E-05 | 0.000135 | -0.00377 | -0.00134 | -0.00246 |
| <i>g__Klebsiella</i>                         | 0.5667   | 1.063    | 0.3449   | 1.053    | 3.78E-05 | 0.000139 | -0.5928  | 0.1807   | -0.2218  |

|                                               |          |          |          |          |          |          |          |          |          |
|-----------------------------------------------|----------|----------|----------|----------|----------|----------|----------|----------|----------|
| <i>g__norank_f__Bacteroidales_S24-7_group</i> | 4.856    | 7.436    | 0.6246   | 1.416    | 3.83E-05 | 0.00014  | -6.239   | -2.455   | -4.231   |
| <i>g__unclassified_f__Prevotellaceae</i>      | 0.00203  | 0.005138 | 9.46E-05 | 0.00054  | 6.52E-05 | 0.000236 | -0.00339 | -0.00085 | -0.00194 |
| <i>g__Cloacibacterium</i>                     | 0.003071 | 0.01241  | 0        | 0        | 7.33E-05 | 0.000253 | -0.00661 | -0.00083 | -0.00307 |
| <i>g__Gaiella</i>                             | 0.00229  | 0.005359 | 4.73E-05 | 0.000384 | 7.2E-05  | 0.000253 | -0.0037  | -0.00095 | -0.00224 |
| <i>g__Psychroglaciecola</i>                   | 0.001718 | 0.004083 | 0        | 0        | 7.32E-05 | 0.000253 | -0.00292 | -0.00078 | -0.00172 |
| <i>g__unclassified_f__Archangiaceae</i>       | 0.001301 | 0.003059 | 0        | 0        | 7.31E-05 | 0.000253 | -0.00213 | -0.00057 | -0.0013  |
| <i>g__Modestobacter</i>                       | 0.001093 | 0.002359 | 0        | 0        | 7.3E-05  | 0.000253 | -0.00177 | -0.00052 | -0.00109 |
| <i>g__norank_f__DA101_soil_group</i>          | 0.001041 | 0.002276 | 0        | 0        | 7.29E-05 | 0.000253 | -0.00161 | -0.00052 | -0.00104 |
| <i>g__unclassified_f__Ruminococcaceae</i>     | 0.4013   | 0.6113   | 0.0566   | 0.07884  | 7.46E-05 | 0.000255 | -0.5108  | -0.191   | -0.3448  |
| <i>g__unclassified_f__Enterobacteriaceae</i>  | 0.1591   | 0.8805   | 0.02262  | 0.1006   | 1E-04    | 0.00034  | -0.3823  | 0.01005  | -0.1365  |
| <i>g__Brevundimonas</i>                       | 0.006507 | 0.03949  | 0        | 0        | 0.000148 | 0.000475 | -0.01697 | -0.00078 | -0.00651 |
| <i>g__norank_f__JG34-KF-361</i>               | 0.001562 | 0.00366  | 0        | 0        | 0.000148 | 0.000475 | -0.00255 | -0.00068 | -0.00156 |
| <i>g__Leucobacter</i>                         | 0.001405 | 0.003325 | 0        | 0        | 0.000148 | 0.000475 | -0.00234 | -0.00057 | -0.00141 |
| <i>g__Arenimonas</i>                          | 0.001353 | 0.003371 | 0        | 0        | 0.000148 | 0.000475 | -0.00229 | -0.00057 | -0.00135 |
| <i>g__norank_f__Planctomycetaceae</i>         | 0.001353 | 0.003271 | 0        | 0        | 0.000148 | 0.000475 | -0.00224 | -0.00057 | -0.00135 |
| <i>g__Gemmatimonas</i>                        | 0.001145 | 0.002504 | 0        | 0        | 0.000148 | 0.000475 | -0.00177 | -0.00057 | -0.00115 |
| <i>g__norank_o__Xanthomonadales</i>           | 0.000833 | 0.001896 | 0        | 0        | 0.000147 | 0.000475 | -0.00135 | -0.00036 | -0.00083 |
| <i>g__Bryobacter</i>                          | 0.000781 | 0.001689 | 0        | 0        | 0.000147 | 0.000475 | -0.00125 | -0.00036 | -0.00078 |
| <i>g__norank_o__Mollicutes_RF9</i>            | 0.1368   | 0.4176   | 0.03805  | 0.1002   | 0.000155 | 0.000491 | -0.2364  | -0.01591 | -0.09875 |
| <i>g__Massilia</i>                            | 0.001353 | 0.003008 | 4.73E-05 | 0.000384 | 0.000157 | 0.000495 | -0.00219 | -0.00058 | -0.00131 |
| <i>g__[Eubacterium]_fissicatena_group</i>     | 0.08349  | 0.1296   | 0.01287  | 0.02467  | 0.000231 | 0.000724 | -0.1072  | -0.03874 | -0.07063 |
| <i>g__Conexibacter</i>                        | 0.001614 | 0.00599  | 0        | 0        | 0.000297 | 0.000887 | -0.00333 | -0.00042 | -0.00161 |
| <i>g__Steroidobacter</i>                      | 0.001145 | 0.003041 | 0        | 0        | 0.000298 | 0.000887 | -0.00198 | -0.00047 | -0.00115 |
| <i>g__Virgisporangium</i>                     | 0.001145 | 0.002815 | 0        | 0        | 0.000298 | 0.000887 | -0.00187 | -0.00047 | -0.00115 |
| <i>g__Blastocatella</i>                       | 0.000885 | 0.002081 | 0        | 0        | 0.000297 | 0.000887 | -0.00146 | -0.00036 | -0.00088 |
| <i>g__norank_f__Elev-16S-1332</i>             | 0.000885 | 0.002081 | 0        | 0        | 0.000297 | 0.000887 | -0.00146 | -0.00042 | -0.00088 |
| <i>g__Rhodoplanes</i>                         | 0.000885 | 0.002081 | 0        | 0        | 0.000297 | 0.000887 | -0.00141 | -0.00042 | -0.00088 |
| <i>g__Skermanella</i>                         | 0.000833 | 0.001896 | 0        | 0        | 0.000297 | 0.000887 | -0.00135 | -0.00036 | -0.00083 |
| <i>g__unclassified_o__Clostridiales</i>       | 0.01869  | 0.02562  | 0.006862 | 0.01443  | 0.000373 | 0.001102 | -0.01941 | -0.0041  | -0.01183 |
| <i>g__Family_XIII_AD3011_group</i>            | 0.0393   | 0.04509  | 0.01547  | 0.0229   | 0.000544 | 0.001598 | -0.03636 | -0.01212 | -0.02383 |

## Supplementary Material

|                                                        |          |          |          |          |          |          |          |          |          |
|--------------------------------------------------------|----------|----------|----------|----------|----------|----------|----------|----------|----------|
| <i>g__Pseudoalteromonas</i>                            | 0.001718 | 0.004433 | 0        | 0        | 0.000594 | 0.001658 | -0.00292 | -0.00062 | -0.00172 |
| <i>g__norank_o_C0119</i>                               | 0.000989 | 0.002603 | 0        | 0        | 0.000594 | 0.001658 | -0.00167 | -0.00036 | -0.00099 |
| <i>g__unclassified_f_Acidobacteriaceae_Subgroup_I_</i> | 0.000989 | 0.002666 | 0        | 0        | 0.000594 | 0.001658 | -0.00172 | -0.00036 | -0.00099 |
| <i>g__Nitrosomonas</i>                                 | 0.000937 | 0.002654 | 0        | 0        | 0.000593 | 0.001658 | -0.00167 | -0.00036 | -0.00094 |
| <i>g__Chryseobacterium</i>                             | 0.000885 | 0.002159 | 0        | 0        | 0.000594 | 0.001658 | -0.00146 | -0.00036 | -0.00088 |
| <i>g__Sulfurimonas</i>                                 | 0.000781 | 0.001961 | 0        | 0        | 0.000593 | 0.001658 | -0.00135 | -0.00031 | -0.00078 |
| <i>g__norank_f_Acidimicrobiaceae</i>                   | 0.000781 | 0.002043 | 0        | 0        | 0.000592 | 0.001658 | -0.0013  | -0.00031 | -0.00078 |
| <i>g__Pelomonas</i>                                    | 0.000729 | 0.001851 | 0        | 0        | 0.000592 | 0.001658 | -0.00125 | -0.00026 | -0.00073 |
| <i>g__Desulfovibrio</i>                                | 0.5013   | 0.7871   | 0.1393   | 0.3278   | 0.000624 | 0.00173  | -0.5794  | -0.156   | -0.362   |
| <i>g__Flavonifractor</i>                               | 0.06611  | 0.125    | 0.1725   | 0.3951   | 0.000628 | 0.00173  | 0.01691  | 0.2147   | 0.1064   |
| <i>g__[Eubacterium]_xylanophilum_group</i>             | 0.0431   | 0.09006  | 0.04604  | 0.1468   | 0.00098  | 0.002683 | -0.03574 | 0.0507   | 0.002945 |
| <i>g__Eisenbergiella</i>                               | 0.01228  | 0.02171  | 0.01126  | 0.04366  | 0.001009 | 0.002745 | -0.01178 | 0.01252  | -0.00102 |
| <i>g__[Eubacterium]_brachy_group</i>                   | 0.01994  | 0.03171  | 0.01169  | 0.06651  | 0.001105 | 0.002987 | -0.02279 | 0.01266  | -0.00825 |
| <i>g__Tissierella</i>                                  | 0.01145  | 0.08502  | 0        | 0        | 0.001174 | 0.003102 | -0.03363 | -0.00026 | -0.01145 |
| <i>g__unclassified_f_Xanthomonadaceae</i>              | 0.000729 | 0.002102 | 0        | 0        | 0.001176 | 0.003102 | -0.00135 | -0.00026 | -0.00073 |
| <i>g__unclassified_c_Betaproteobacteria</i>            | 0.000677 | 0.001915 | 0        | 0        | 0.001174 | 0.003102 | -0.0012  | -0.00026 | -0.00068 |
| <i>g__Kurthia</i>                                      | 0.000573 | 0.001465 | 0        | 0        | 0.001174 | 0.003102 | -0.00094 | -0.00021 | -0.00057 |
| <i>g__Weissella</i>                                    | 0.01994  | 0.06107  | 0.000473 | 0.002139 | 0.001267 | 0.003303 | -0.03699 | -0.00609 | -0.01946 |
| <i>g__Propionibacterium</i>                            | 0.001093 | 0.002624 | 4.73E-05 | 0.000384 | 0.001267 | 0.003303 | -0.00177 | -0.00043 | -0.00105 |
| <i>g__norank_f_Lachnospiraceae</i>                     | 1.022    | 0.9018   | 0.7916   | 1.435    | 0.001629 | 0.004221 | -0.6233  | 0.217    | -0.2307  |
| <i>g__Comamonas</i>                                    | 0.001405 | 0.003833 | 9.46E-05 | 0.00054  | 0.002286 | 0.005682 | -0.00231 | -0.00048 | -0.00131 |
| <i>g__norank_c_S085</i>                                | 0.000677 | 0.001915 | 0        | 0        | 0.002322 | 0.005682 | -0.0012  | -0.00026 | -0.00068 |
| <i>g__Azospirillum</i>                                 | 0.000677 | 0.002578 | 0        | 0        | 0.002314 | 0.005682 | -0.00141 | -0.00021 | -0.00068 |
| <i>g__Aquabacterium</i>                                | 0.000625 | 0.0018   | 0        | 0        | 0.002321 | 0.005682 | -0.00109 | -0.00026 | -0.00062 |
| <i>g__Sphingobacterium</i>                             | 0.000573 | 0.001863 | 0        | 0        | 0.002314 | 0.005682 | -0.00109 | -0.00021 | -0.00057 |
| <i>g__Actinophytocola</i>                              | 0.000573 | 0.001676 | 0        | 0        | 0.002318 | 0.005682 | -0.00104 | -0.00021 | -0.00057 |
| <i>g__Taibaiella</i>                                   | 0.000573 | 0.001676 | 0        | 0        | 0.002318 | 0.005682 | -0.00104 | -0.00021 | -0.00057 |
| <i>g__Venenivibrio</i>                                 | 0.000573 | 0.001574 | 0        | 0        | 0.00232  | 0.005682 | -0.00099 | -0.00021 | -0.00057 |
| <i>g__unclassified_f_Intrasporangiaceae</i>            | 0.000521 | 0.001539 | 0        | 0        | 0.002314 | 0.005682 | -0.00094 | -0.00021 | -0.00052 |
| <i>g__Nordella</i>                                     | 0.000469 | 0.001263 | 0        | 0        | 0.002314 | 0.005682 | -0.00083 | -0.00016 | -0.00047 |
| <i>g__Ruminococcaceae_UCG-009</i>                      | 0.02868  | 0.03656  | 0.01358  | 0.0245   | 0.003183 | 0.007744 | -0.02584 | -0.00496 | -0.0151  |



|                                               |          |          |          |          |          |          |          |          |          |
|-----------------------------------------------|----------|----------|----------|----------|----------|----------|----------|----------|----------|
| <i>g__unclassified_f__Christensenellaceae</i> | 0.002082 | 0.004173 | 0.000994 | 0.004319 | 0.003444 | 0.008333 | -0.00248 | 0.000516 | -0.00109 |
| <i>g__Coprococcus_1</i>                       | 0.121    | 0.1397   | 0.07169  | 0.08931  | 0.004159 | 0.01001  | -0.09582 | -0.01011 | -0.04933 |
| <i>g__Pedobacter</i>                          | 0.000677 | 0.002234 | 0        | 0        | 0.00456  | 0.01057  | -0.0013  | -0.00016 | -0.00068 |
| <i>g__Lechevaleria</i>                        | 0.000625 | 0.002057 | 0        | 0        | 0.00456  | 0.01057  | -0.0012  | -0.00021 | -0.00062 |
| <i>g__Ureaplasma</i>                          | 0.000573 | 0.001772 | 0        | 0        | 0.00456  | 0.01057  | -0.00104 | -0.00021 | -0.00057 |
| <i>g__Luteibacter</i>                         | 0.000469 | 0.001388 | 0        | 0        | 0.004556 | 0.01057  | -0.00083 | -0.00016 | -0.00047 |
| <i>g__Reyranella</i>                          | 0.000469 | 0.001502 | 0        | 0        | 0.00455  | 0.01057  | -0.00088 | -0.00016 | -0.00047 |
| <i>g__Tumebacillus</i>                        | 0.000469 | 0.001388 | 0        | 0        | 0.004556 | 0.01057  | -0.00083 | -0.00016 | -0.00047 |
| <i>g__unclassified_f__Erythrobacteraceae</i>  | 0.000364 | 0.001011 | 0        | 0        | 0.004542 | 0.01057  | -0.00062 | -0.00016 | -0.00036 |
| <i>g__Ruminococcaceae_UCG-010</i>             | 0.04039  | 0.07559  | 0.04519  | 0.1507   | 0.005119 | 0.0118   | -0.03301 | 0.05252  | 0.004802 |
| <i>g__norank_p__Saccharibacteria</i>          | 0.02499  | 0.04291  | 0.0151   | 0.02981  | 0.005453 | 0.01251  | -0.02326 | 0.002943 | -0.00989 |
| <i>g__Clostridium_sensu_stricto_3</i>         | 0.000573 | 0.001574 | 9.46E-05 | 0.000769 | 0.0061   | 0.01392  | -0.00094 | -6.2E-05 | -0.00048 |
| <i>g__unclassified_f__Coriobacteriaceae</i>   | 0.001874 | 0.004535 | 0.000615 | 0.002206 | 0.007476 | 0.01697  | -0.0027  | -9E-05   | -0.00126 |
| <i>g__Tyzzerella</i>                          | 0.01291  | 0.02781  | 0.02238  | 0.09932  | 0.007977 | 0.01801  | -0.01162 | 0.03959  | 0.009472 |
| <i>g__Sellimonas</i>                          | 0.001093 | 0.003629 | 0.01978  | 0.06932  | 0.008081 | 0.01815  | 0.005309 | 0.03754  | 0.01869  |
| <i>g__Nocardioides</i>                        | 0.001041 | 0.005353 | 0        | 0        | 0.008935 | 0.01938  | -0.0026  | -0.0001  | -0.00104 |
| <i>g__norank_f__Caulobacteraceae</i>          | 0.000677 | 0.002513 | 0        | 0        | 0.008936 | 0.01938  | -0.00141 | -0.00016 | -0.00068 |
| <i>g__norank_f__Mitochondria</i>              | 0.000416 | 0.001344 | 0        | 0        | 0.00893  | 0.01938  | -0.00078 | -0.0001  | -0.00042 |
| <i>g__Mycoplasma</i>                          | 0.000416 | 0.001344 | 0        | 0        | 0.00893  | 0.01938  | -0.00083 | -0.00016 | -0.00042 |
| <i>g__norank_o__JG30-KF-AS9</i>               | 0.000416 | 0.001344 | 0        | 0        | 0.00893  | 0.01938  | -0.00078 | -0.0001  | -0.00042 |
| <i>g__Vitreoscilla</i>                        | 0.000364 | 0.001163 | 0        | 0        | 0.008924 | 0.01938  | -0.00068 | -0.0001  | -0.00036 |
| <i>g__Rhizomicrobium</i>                      | 0.000364 | 0.001163 | 0        | 0        | 0.008924 | 0.01938  | -0.00073 | -0.0001  | -0.00036 |
| <i>g__Parasutterella</i>                      | 0.2367   | 0.4548   | 0.3006   | 0.8893   | 0.009103 | 0.01964  | -0.1663  | 0.3284   | 0.0639   |
| <i>g__Solobacterium</i>                       | 0.004633 | 0.01242  | 0.001893 | 0.005018 | 0.01003  | 0.02152  | -0.00663 | 0.000142 | -0.00274 |
| <i>g__Candidatus_Solibacter</i>               | 0.000625 | 0.0018   | 4.73E-05 | 0.000384 | 0.01012  | 0.02152  | -0.00109 | -0.00016 | -0.00058 |
| <i>g__Pedomicrobium</i>                       | 0.000625 | 0.0018   | 4.73E-05 | 0.000384 | 0.01012  | 0.02152  | -0.00105 | -0.00018 | -0.00058 |
| <i>g__Bacteroides</i>                         | 13.68    | 11.73    | 21.89    | 17.64    | 0.01041  | 0.02202  | 2.895    | 13.08    | 8.208    |
| <i>g__Peptococcus</i>                         | 0.006975 | 0.01105  | 0.006909 | 0.02533  | 0.01194  | 0.02515  | -0.00599 | 0.007545 | -6.7E-05 |
| <i>g__Escherichia-Shigella</i>                | 1.686    | 3.634    | 1.949    | 5.607    | 0.01497  | 0.03137  | -1.291   | 2.003    | 0.2625   |
| <i>g__unclassified_f__Rhodobacteraceae</i>    | 0.000416 | 0.001571 | 0        | 0        | 0.0175   | 0.03501  | -0.00083 | -0.0001  | -0.00042 |

Supplementary Material

|                                          |          |          |          |          |         |         |          |          |          |
|------------------------------------------|----------|----------|----------|----------|---------|---------|----------|----------|----------|
| <i>g_norank_d_Bacteria</i>               | 0.000364 | 0.001419 | 0        | 0        | 0.0175  | 0.03501 | -0.00078 | -5.2E-05 | -0.00036 |
| <i>g_Craurococcus</i>                    | 0.000364 | 0.001419 | 0        | 0        | 0.0175  | 0.03501 | -0.00078 | -5.2E-05 | -0.00036 |
| <i>g_norank_f_Chitinophagaceae</i>       | 0.000364 | 0.001298 | 0        | 0        | 0.0175  | 0.03501 | -0.00073 | -5.2E-05 | -0.00036 |
| <i>g_unclassified_o_Acidimicrobiales</i> | 0.000312 | 0.001106 | 0        | 0        | 0.0175  | 0.03501 | -0.00062 | -5.2E-05 | -0.00031 |
| <i>g_norank_f_KF-JG30-B3</i>             | 0.000312 | 0.001106 | 0        | 0        | 0.0175  | 0.03501 | -0.00062 | -5.2E-05 | -0.00031 |
| <i>g_norank_c_JG30-KF-CM66</i>           | 0.00026  | 0.000871 | 0        | 0        | 0.01748 | 0.03501 | -0.00052 | -5.2E-05 | -0.00026 |
| <i>g_norank_f_FFCH7168</i>               | 0.00026  | 0.000871 | 0        | 0        | 0.01748 | 0.03501 | -0.00052 | -5.2E-05 | -0.00026 |
| <i>g_Candidatus_Arthromitus</i>          | 0.00026  | 0.000871 | 0        | 0        | 0.01748 | 0.03501 | -0.00052 | -5.2E-05 | -0.00026 |
| <i>g_Pirellula</i>                       | 0.00026  | 0.000871 | 0        | 0        | 0.01748 | 0.03501 | -0.00047 | -5.2E-05 | -0.00026 |
| <i>g_Oscillospira</i>                    | 0.000364 | 0.001734 | 0.001514 | 0.003883 | 0.01839 | 0.0366  | 0.00018  | 0.002224 | 0.00115  |
| <i>g_Gordonibacter</i>                   | 0.002447 | 0.005114 | 0.001514 | 0.005485 | 0.02231 | 0.04422 | -0.00272 | 0.001135 | -0.00093 |
